# Supplementary material for: Facile synthesis of ultralong hydroxyapatite nanowires using wormlike micelles as soft templates
Source: Royal Society of Chemistry journal article supplement (doi:10.1039/d1ce00488c), 2021-01-01
Supplement: d1ce00488c1.pdf [file d1ce00488c1.pdf]

## Electronic Supplementary Information

for:

### Facile synthesis of ultralong hydroxyapatite nanowire using wormlike micelles as soft templates

Junhua Zhao <sup>a,\*</sup>, Qin Hu <sup>b</sup>, Yinlin Lei <sup>a,\*</sup>, Chuanhua Gao <sup>a</sup>, Pinjie Zhang <sup>c</sup>, Bo Zhou <sup>d</sup>, Gongjun Zhang <sup>e</sup>, Xiaoge Lou <sup>a</sup>, Xiaoli Zhou <sup>a</sup>

<sup>a</sup>College of Chemical and Material Engineering, Quzhou University, Quzhou 324000, Zhejiang, China.

<sup>b</sup>Institute of ZheJiang University-Quzhou, Quzhou 324000, Zhejiang, China.

<sup>c</sup>Zhejiang Juhua Co., Ltd., Quzhou 324004, Zhejiang, China

<sup>d</sup>Zhejiang Green Industry Development Research Institute, Quzhou 324003, Zhejiang, China

<sup>e</sup>Ningbo Institute of Materials Technology and Engineering, CAS, Ningbo 315201, Zhejiang, China

\*Corresponding author: E-mail: zhaojh1018@163.com, nblaolei@vip.163.com

#### **Synthesis of the hydroxyapatite/carbon composite adsorbent**

0.1g hydroxyapatite was mixed with 80 ml deionized water and 10.00 ml benzyl alcohol. The hydroxyapatite dispersion was prepared after ultrasonic agitation at 40 kHz (300 W) for 6 h. 30.00 ml dispersion was mixed with 88.0 g of rice husk biomass carbon after stirred for 30 min, and then slowly added with 50 ml Polyvinyl alcohol (PVA-124) aqueous solution. The pellet composite adsorbent was synthesized after mechanical kneading and drying at 60 °C for 5 h. The carbon adsorbent was synthesized with the same progress without adding hydroxyapatite dispersion.

#### **Adsorption experiments**

##### (1) Effect of solution pH

The pH value of 50 mg/L methyl orange (MO) solution was adjust to 3, 4, 5, 6 and 7 with 1.00 mol/L NaOH or 1.00 mol/ L HCl, respectively. 0.30 g adsorbent was added into 30.00 ml MO solution in a constant temperature oscillator, and vibrate at temperature 50 °C for 4 h at 160 rpm. After the adsorption, the concentration of MO solution was determined by the UV-Vis spectrophotometer at 465 nm.

The adsorption equilibrium concentration of MO was calculated by the following equation:

$$A = \varepsilon \cdot b \cdot C_e$$

Where  $A$  is the absorbance of MO solution,  $\varepsilon$  is molar absorptivity of MO,  $b$  is the thickness of the cuvette,  $C_e$  is the adsorption equilibrium concentration of MO.

The unit adsorption amount of MO ( $q_e$ ) is calculated according to following formula:

$$q_e = (C_0 - C_e) \cdot V/W$$

Where  $C_0$  is the initial adsorption concentration of MO,  $V$  is the volume of solution,  $W$  is the mass of adsorbent.

The removal efficiency ( $P$ ) of MO is calculated according to following equation:

$$P = (C_0 - C_e)/C_0 \cdot 100\%$$

### (2) Effect of solution temperature

The pH value of 50 mg/L methyl orange (MO) solution was adjusted to 4 with 0.10 mol/L NaOH. 0.30 g adsorbent was added into 30.00 ml MO solution in a constant temperature oscillator, and vibrates for 4 h at 160 rpm at temperature 20, 30, 40, 50, 60 °C, respectively. After the adsorption, the concentration of MO solution was determined by the UV-Vis spectrophotometer at 465 nm. The removal efficiency of MO was calculated by the above formula.

### (3) Effect of contact time

The pH value of 50 mg/L methyl orange (MO) solution was adjusted to 4 with 0.10 mol/L NaOH. 0.30 g adsorbent was added into 30.00 ml MO solution in a constant temperature oscillator, and vibrates at temperature 50 °C for 60 min, 120 min, 180 min, 240 min, 300 min at 160 rpm, respectively. After the adsorption, the concentration of MO solution was determined by the UV-Vis spectrophotometer at 465 nm. The removal efficiency of MO was calculated by the above formula.

The quasi-first-order kinetic equation was calculated as follow:

$$\ln(q_e - q_t) = \ln q_e - k_1 \cdot t$$

Where  $q_e$  and  $q_t$  are the adsorption capacity at  $t$  and equilibrium state, respectively.  $k_1$  is the first order adsorption rate constant.

The quasi-second-order kinetic equation was calculated as follow:

$$t/q_t = 1/(k_2 \cdot q_e^2) + t/q_e$$

where  $k_2$  is the second order adsorption rate constant.

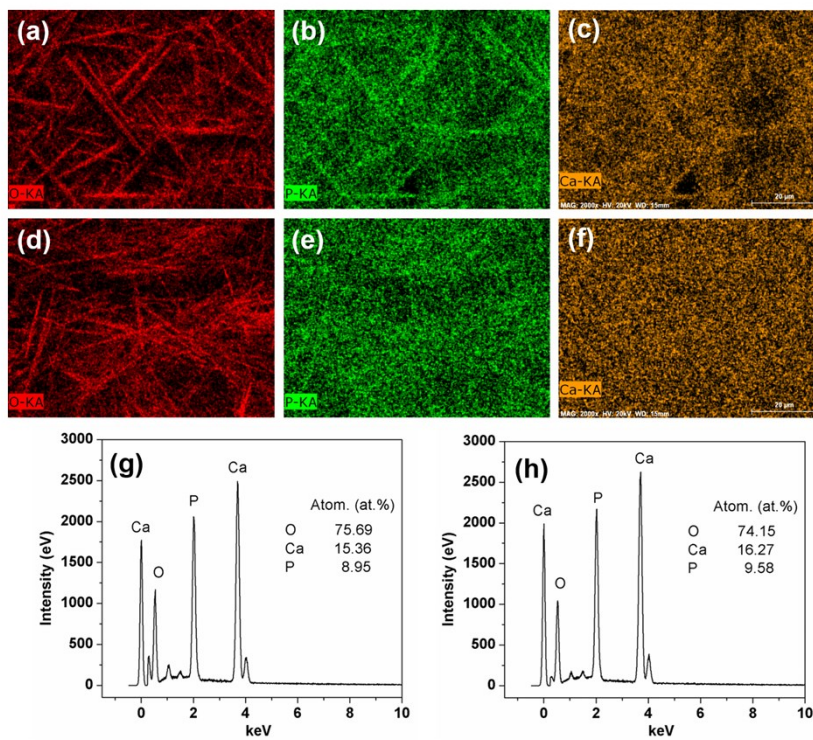

**Fig. S1** Elemental mapping (a-c) and SEM-EDS (g) of HAP1# sample, and elemental mapping (d-f) and SEM-EDS (h) of HAP2# sample

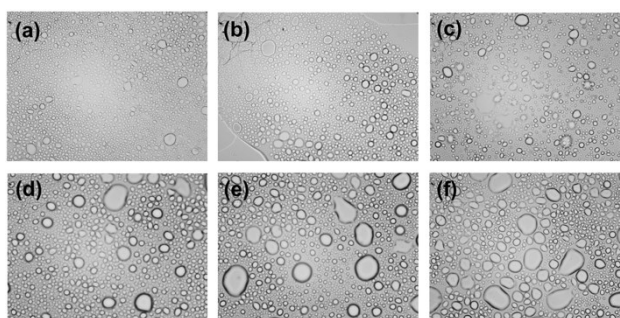

**Fig. S2** Optical microscope images (200× magnification) of the HAP1# solution system with dropwise adding of CaCl<sub>2</sub> aqueous solution. For attaining better monitor the reaction process, the photos taken every five minutes.

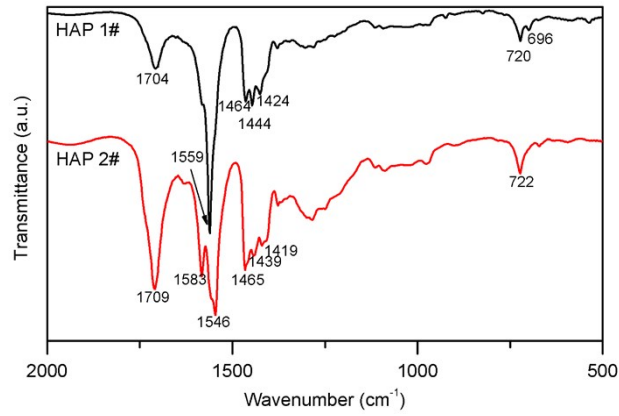

**Fig. S3** The Fourier transform infrared spectra for HAP1# and HAP2# precursor of reaction process.

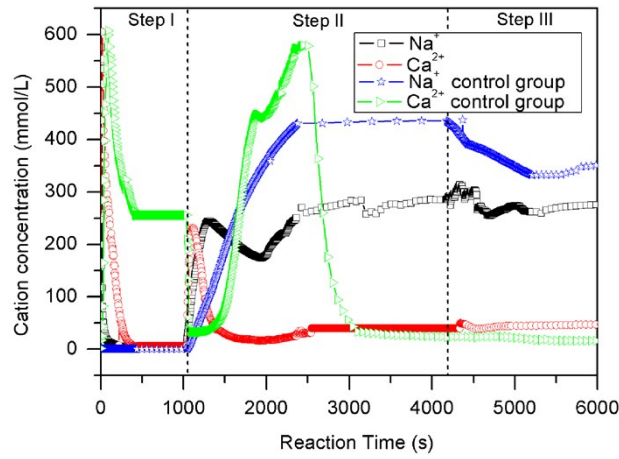

**Fig. S4** The variation of cation concentration in reaction process for HAP1#. For comparison, the reaction solution of control group was exchanged to deionized water.

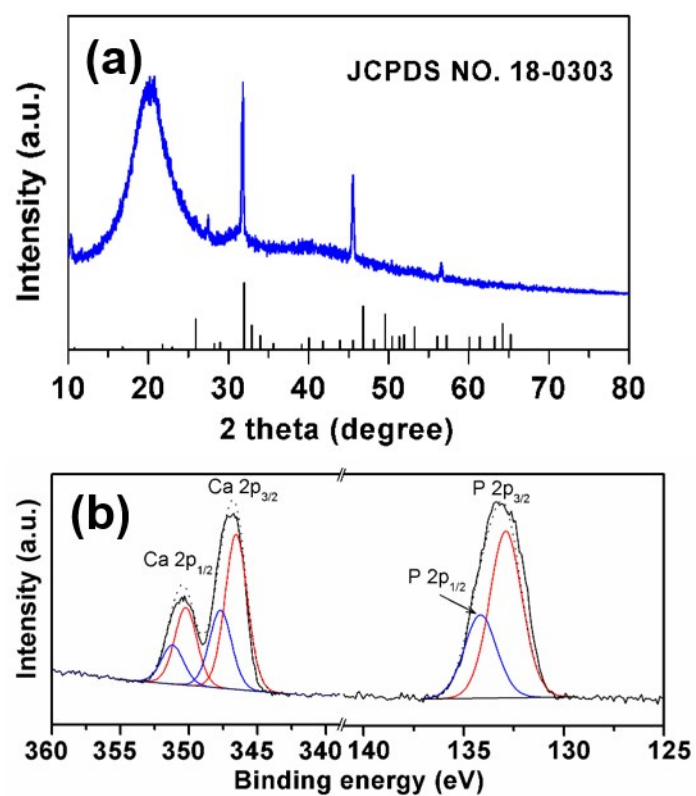

Fig. S5 The (a) XRD pattern and (b) XPS spectra of Ca 2p and P 2p of precursor synthesized by oleic acid as reactant. The binding energy of the Ca 2p<sub>3/2</sub> peak center at 346.5 eV was for calcium phosphate, and the Ca 2p<sub>3/2</sub> peak center at 347.7 eV was for calcium oleate.

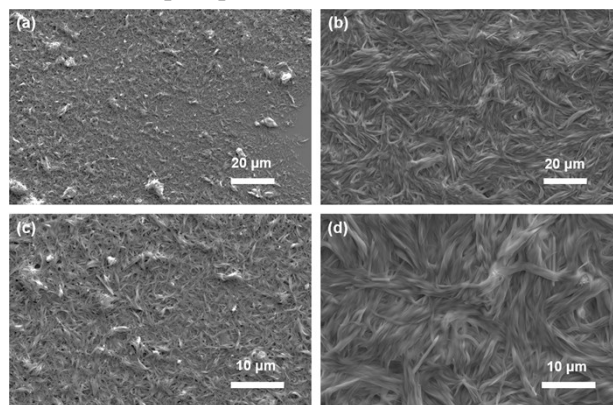

Fig. S6 The SEM image of HAP synthesized by (a, c) sodium oleate as reactant with pH=8.0 (HAP4#), (b, d) oleic acid as reactant with pH=8.0 (HAP5#).

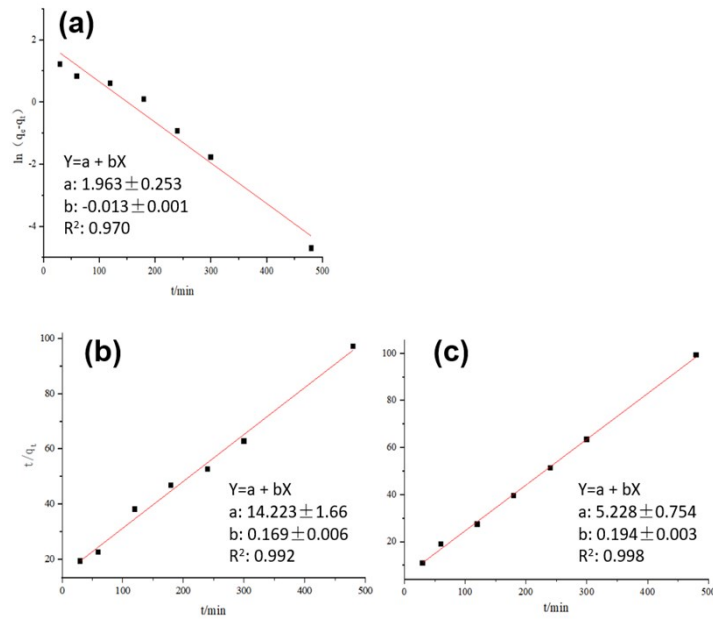

**Fig. S7** The (a) pseudo-first-order (PFO) and (c) pseudo-second-order (PSO) adsorption kinetic models for methyl orange (MO) adsorption on hydroxyapatite/carbon (HAP1#/C) composite adsorbent. The (b) PSO adsorption kinetic models for MO adsorption on carbon.
